# Supplementary material
Source: ML conference proceedings conference paper supplement (https://proceedings.mlr.press/v139/kalantzis21a.html)
Supplement: Supplementary file 1 [file kalantzis21a-supp.pdf]

## Supplementary Material

### Proofs

#### Proof of Proposition 1

The scalar-vector pair  $(\hat{\sigma}_i^2, \hat{u}^{(i)})$  satisfies the equation  $(AA^H - \hat{\sigma}_i^2 I_{m+s})\hat{u}^{(i)} = 0$ . If we partition the  $i$ 'th left singular vector as

$$\hat{u}^{(i)} = \begin{pmatrix} \hat{f}^{(i)} \\ \hat{y}^{(i)} \end{pmatrix},$$

we can write

$$\begin{pmatrix} BB^H - \hat{\sigma}_i^2 I_m & BE^H \\ EB^H & EE^H - \hat{\sigma}_i^2 I_s \end{pmatrix} \begin{pmatrix} \hat{f}^{(i)} \\ \hat{y}^{(i)} \end{pmatrix} = 0.$$

The leading  $m$  rows satisfy  $(BB^H - \hat{\sigma}_i^2 I_m)\hat{f}^{(i)} = -BE^H\hat{y}^{(i)}$ . Plugging the expression of  $\hat{f}^{(i)}$  in the second block of rows and considering the full SVD  $B = U\Sigma V^H$  leads to

$$\begin{aligned} 0 &= [EE^H - EB^H(BB^H - \hat{\sigma}_i^2 I_m)^{-1}BE^H - \hat{\sigma}_i^2 I_s] \hat{y}^{(i)} \\ &= [E(I_s - B^H(BB^H - \hat{\sigma}_i^2 I_m)^{-1}B)E^H - \hat{\sigma}_i^2 I_s] \hat{y}^{(i)} \\ &= [E(VV^H + V\Sigma^T(\hat{\sigma}_i^2 I_m - \Sigma\Sigma^T)^{-1}\Sigma V^H)E^H - \hat{\sigma}_i^2 I_s] \hat{y}^{(i)} \\ &= [EV(I_n + \Sigma^T(\hat{\sigma}_i^2 I_m - \Sigma\Sigma^T)^{-1}\Sigma)V^HE^H - \hat{\sigma}_i^2 I_s] \hat{y}^{(i)}. \end{aligned}$$

The proof concludes by noticing that

$$I_n + \Sigma^T(\hat{\sigma}_i^2 I_m - \Sigma\Sigma^T)^{-1}\Sigma = \begin{pmatrix} 1 + \frac{\sigma_1^2}{\hat{\sigma}_i^2 - \sigma_1^2} & & & \\ & \ddots & & \\ & & \ddots & \\ & & & 1 + \frac{\sigma_n^2}{\hat{\sigma}_i^2 - \sigma_n^2} \end{pmatrix} = \begin{pmatrix} \frac{\hat{\sigma}_i^2}{\hat{\sigma}_i^2 - \sigma_1^2} & & & \\ & \ddots & & \\ & & \ddots & \\ & & & \frac{\hat{\sigma}_i^2}{\hat{\sigma}_i^2 - \sigma_n^2} \end{pmatrix},$$

where for the case  $m < n$ , we have  $\sigma_j = 0$  for any  $j = m + 1, \dots, n$ . In case  $\hat{\sigma}_i = \sigma_j$ , the Moore-Penrose pseudoinverse  $(BB^H - \hat{\sigma}_i^2 I_m)^\dagger$  is considered instead.

#### Proof of Proposition 2

Since the left singular vectors of  $B$  span  $\mathbb{R}^m$ , we can write

$$BE^H\hat{y}^{(i)} = \sum_{j=1}^m \sigma_j u^{(j)} \left( Ev^{(j)} \right)^H \hat{y}^{(i)}.$$

The proof concludes by noticing that the top  $m \times 1$  part of  $\hat{u}^{(i)}$  can be written as

$$\begin{aligned} \hat{f}^{(i)} &= -(BB^H - \hat{\sigma}_i^2 I_m)^{-1}BE^H\hat{y}^{(i)} \\ &= -U(\Sigma\Sigma^T - \hat{\sigma}_i^2 I_m)^{-1}\Sigma(EV)^H\hat{y}^{(i)} \\ &= -\sum_{j=1}^{\min(m,n)} u^{(j)} \frac{\sigma_j}{\sigma_j^2 - \hat{\sigma}_i^2} \left( Ev^{(j)} \right)^H \hat{y}^{(i)} \\ &= -\sum_{j=1}^{\min(m,n)} u^{(j)} \frac{\sigma_j}{\sigma_j^2 - \hat{\sigma}_i^2} \left( Ev^{(j)} \right)^H \hat{y}^{(i)} \\ &= \sum_{j=1}^{\min(m,n)} u^{(j)} \chi_{j,i}. \end{aligned}$$

**Proof of Proposition 3**

We have

$$\begin{aligned}
 \min_{z \in \text{range}(Z)} \|\hat{u}^{(i)} - z\| &\leq \left\| \begin{pmatrix} u^{(k+1)}, \dots, u^{(\min(m,n))} \end{pmatrix} \begin{pmatrix} \chi_{k+1,i} \\ \vdots \\ \chi_{\min(m,n),i} \end{pmatrix} \right\| \\
 &= \left\| \begin{pmatrix} \mathbf{0}_{k,k} & & & \\ & \frac{\sigma_{k+1}}{\sigma_{k+1}^2 - \hat{\sigma}_i^2} & & \\ & & \ddots & \\ & & & \frac{\sigma_{\min(m,n)}}{\sigma_{\min(m,n)}^2 - \hat{\sigma}_i^2} \end{pmatrix} V^H E^H \hat{y}^{(i)} \right\| \\
 &\leq \max \left\{ \left| \frac{\sigma_j}{\sigma_j^2 - \hat{\sigma}_i^2} \right| \right\}_{j=k+1, \dots, \min(m,n)} \|E^H \hat{y}^{(i)}\|.
 \end{aligned}$$

The proof follows by noticing that due to Cauchy's interlacing theorem we have  $\sigma_{k+1}^2 \leq \hat{\sigma}_i^2$ ,  $i = 1, \dots, k$ , and thus

$$\left| \frac{\sigma_{k+1}}{\sigma_{k+1}^2 - \hat{\sigma}_i^2} \right| \geq \dots \geq \left| \frac{\sigma_{\min(m,n)}}{\sigma_{\min(m,n)}^2 - \hat{\sigma}_i^2} \right|.$$

**Proof of Lemma 1**

We can write

$$\begin{aligned}
 B(\lambda) &= (I - U_k U_k^H) U \begin{pmatrix} \sigma_1^2 - \lambda & & & \\ & \ddots & & \\ & & \ddots & \\ & & & \sigma_m^2 - \lambda \end{pmatrix}^{-1} U^H \\
 &= U \begin{pmatrix} \mathbf{0}_{k,k} & & & \\ & \frac{1}{\sigma_{k+1}^2 - \lambda} & & \\ & & \ddots & \\ & & & \frac{1}{\sigma_m^2 - \lambda} \end{pmatrix} U^H,
 \end{aligned}$$

where  $\sigma_j = 0$  for any  $j > \min(m, n)$ . Let us now define the scalar  $\gamma_{j,i} = \frac{\hat{\sigma}_i^2 - \lambda}{\sigma_j^2 - \lambda}$ . Then,

$$B(\lambda) [(\hat{\sigma}_i^2 - \lambda) B(\lambda)]^p = U \begin{pmatrix} \mathbf{0}_{k,k} & & & \\ & \frac{\gamma_{k+1,i}^p}{\sigma_{k+1}^2 - \lambda} & & \\ & & \ddots & \\ & & & \frac{\gamma_{m,i}^p}{\sigma_m^2 - \lambda} \end{pmatrix} U^H.$$

Accounting for all powers  $p = 0, 1, 2, \dots$ , gives

$$B(\lambda) \sum_{\rho=0}^{\infty} [(\hat{\sigma}_i^2 - \lambda) B(\lambda)]^\rho = U \begin{pmatrix} \mathbf{0}_{k,k} & & & \\ & \frac{\sum_{\rho=0}^{\infty} \gamma_{k+1,i}^\rho}{\sigma_{k+1}^2 - \lambda} & & \\ & & \ddots & \\ & & & \frac{\sum_{\rho=0}^{\infty} \gamma_{m,i}^\rho}{\sigma_m^2 - \lambda} \end{pmatrix} U^H.$$

Since  $\lambda > \hat{\sigma}_k^2 \geq \sigma_k^2$ , it follows that for any  $j > k$  we have  $|\gamma_{j,i}| < 1$ . Therefore, the geometric series converges and  $\sum_{\rho=0}^{\infty} \gamma_{j,i}^\rho = \frac{1}{1 - \gamma_{j,i}} = \frac{\sigma_j^2 - \lambda}{\sigma_j^2 - \hat{\sigma}_i^2}$ . It follows that  $\frac{1}{\sigma_j^2 - \lambda} \sum_{\rho=0}^{\infty} \gamma_{j,i}^\rho = \frac{1}{\sigma_j^2 - \hat{\sigma}_i^2}$ .

We finally have

$$\begin{aligned} B(\lambda) \sum_{\rho=0}^{\infty} [(\hat{\sigma}_i^2 - \lambda)B(\lambda)]^\rho &= U \begin{pmatrix} \mathbf{0}_{k,k} & & & \\ & \frac{1}{\sigma_{k+1}^2 - \hat{\sigma}_i^2} & & \\ & & \ddots & \\ & & & \frac{1}{\sigma_m^2 - \hat{\sigma}_i^2} \end{pmatrix} U^H \\ &= (I - U_k U_k^H) B(\hat{\sigma}_i^2). \end{aligned}$$

This concludes the proof.

#### Proof of Proposition 4

First, notice that

$$(BB^H - \hat{\sigma}_i^2 I_m)^{-1} = U_k U_k^H (BB^H - \hat{\sigma}_i^2 I_m)^{-1} + (I_m - U_k U_k^H) (BB^H - \hat{\sigma}_i^2 I_m)^{-1}.$$

Therefore, we can write

$$(BB^H - \hat{\sigma}_i^2 I_m)^{-1} B E^H \hat{y}^{(i)} = U_k (\Sigma_k^2 - \hat{\sigma}_i^2 I_k)^{-1} \Sigma_k (E V_k)^H \hat{y}^{(i)} + (I_m - U_k U_k^H) (BB^H - \hat{\sigma}_i^2 I_m)^{-1} B E^H \hat{y}^{(i)}.$$

The left singular vector  $\hat{u}^{(i)}$  can be then expressed as

$$\begin{aligned} \hat{u}^{(i)} &= \begin{pmatrix} -(BB^H - \hat{\sigma}_i^2 I_m)^{-1} B E^H \\ I_s \end{pmatrix} \hat{y}^{(i)} \\ &= \begin{pmatrix} u^{(1)}, \dots, u^{(k)} \\ I_s \end{pmatrix} \begin{pmatrix} \chi_{1,i} \\ \vdots \\ \chi_{k,i} \\ \hat{y}^{(i)} \end{pmatrix} - \begin{pmatrix} B(\hat{\sigma}_i^2) B E^H \hat{y}^{(i)} \end{pmatrix}. \end{aligned}$$

The proof concludes by noticing that by Lemma 1 we have  $B(\hat{\sigma}_i^2) = B(\lambda) \sum_{\rho=0}^{\infty} [(\hat{\sigma}_i^2 - \lambda)B(\lambda)]^\rho$ .

#### Proof of Proposition 5

The proof exploits the formula

$$(B(\hat{\sigma}_i^2) - B(\lambda)) B E^H = (I - U_k U_k^H) U [(\Sigma \Sigma^T - \hat{\sigma}_i^2 I_m)^{-1} - (\Sigma \Sigma^T - \lambda I_m)^{-1}] U^H U \Sigma V^H E^H.$$

It follows

$$\begin{aligned} \min_{z \in \text{range}(Z)} \|\hat{u}^{(i)} - z\| &\leq \left\| \begin{pmatrix} [B(\hat{\sigma}_i^2) - B(\lambda)] B E^H \hat{y}^{(i)} \\ \mathbf{0}_{k,k} \\ \frac{\sigma_{k+1}(\hat{\sigma}_i^2 - \lambda)}{(\sigma_{k+1}^2 - \hat{\sigma}_i^2)(\sigma_{k+1}^2 - \lambda)} \\ \vdots \\ \frac{\sigma_{\min(m,n)}(\hat{\sigma}_i^2 - \lambda)}{(\sigma_{\min(m,n)}^2 - \hat{\sigma}_i^2)(\sigma_{\min(m,n)}^2 - \lambda)} \end{pmatrix} \right\| \left\| E^H \hat{y}^{(i)} \right\| \\ &= \max \left\{ \left\| \frac{\sigma_j(\hat{\sigma}_i^2 - \lambda)}{(\sigma_j^2 - \hat{\sigma}_i^2)(\sigma_j^2 - \lambda)} \right\| \right\}_{j=k+1, \dots, \min(m,n)} \left\| E^H \hat{y}^{(i)} \right\|. \end{aligned}$$

## Asymptotic complexity

The asymptotic complexity analysis of the method in (Zha & Simon, 1999) is as follows. We need  $O(n s^2 + n s k)$  FLOPs to form  $(I_s - V_k V_k^H) E^H$  and compute its QR decomposition. The SVD of the matrix  $Z^H A W$  requires  $O((k+s)^3)$  FLOPs. Finally, the cost to form the approximation of matrices  $\hat{U}_k$  and  $\hat{V}_k$  is equal to  $O(k^2(m+n) + n s k)$  FLOPs.

The asymptotic complexity analysis for the ‘‘SV’’ variant of the method in (Vecharynski & Saad, 2014) is as follows. We need  $O((\text{nnz}(E) + n k) \delta_1 + (n + s) \delta_1^2)$  FLOPs to approximate the  $r$  leading singular triplets of  $(I_s - V_k V_k^H) E^H$ , where  $\delta_1 \in \mathbb{Z}^*$  is greater than or equal to  $r$  (i.e.,  $\delta_1$  is the number of Lanczos bidiagonalization steps). The cost to form and compute the SVD of the matrix  $Z^H A W$  is equal to  $(k+s)(k+r)^2 + \text{nnz}(E)k + r s$  where the first term stands for the actual SVD and the rest of the terms stand for the formation of the matrix  $Z^H A W$ . Finally, the cost to form the approximation of matrices  $\hat{U}_k$  and  $\hat{V}_k$  is equal to  $O(k^2(m+n) + n r k)$  FLOPs.

The asymptotic complexity analysis of Algorithm 1 is as follows. First, notice that Algorithm 1 requires no effort to build  $W$ . For the case where  $Z$  is set as in Proposition 3, termed as ‘‘Alg. 1 (a)’’, we also need no FLOPs to build  $Z$ . The cost to solve the projected problem by unrestarted Lanczos is then equal to  $O((\text{nnz}(E) + n k) \delta_2 + (k+s) \delta_2^2)$  FLOPs, where  $\delta_2 \in \mathbb{Z}^*$  is greater than or equal to  $k$  (i.e.,  $\delta_2$  is the number of steps in unrestarted Lanczos). Finally, the cost to form the approximation of matrices  $\hat{U}_k$  and  $\hat{V}_k$  is equal to  $O(k^2 m + (\text{nnz}(A) + n) k)$  FLOPs. For the case where  $Z$  is set as in Proposition 5, termed as ‘‘Alg. 1 (b)’’, we need

$$\chi = O(\text{nnz}(A) \delta_3 + m \delta_3^2)$$

FLOPs to build  $X_{\lambda, r}$ , where  $\delta_3 \in \mathbb{Z}^*$  is greater than or equal to  $k$  (i.e.,  $\delta_3$  is either the number of Lanczos bidiagonalization steps or the number of columns of matrix  $R$  in randomized SVD).

Table 6. Detailed asymptotic complexity of Algorithm 1 and the schemes in (Zha & Simon, 1999) and (Vecharynski & Saad, 2014). All  $\delta$  variables are replaced by  $k$ .

| Scheme                     | Building $Z$ | Building $W$                            | Solving the projected problem               | Other                           |
|----------------------------|--------------|-----------------------------------------|---------------------------------------------|---------------------------------|
| (Zha & Simon, 1999)        | -            | $n s^2 + n s k$                         | $(k+s)^3$                                   | $k^2(m+n) + n s k$              |
| (Vecharynski & Saad, 2014) | -            | $(\text{nnz}(E) + n k) k + (n + s) k^2$ | $(k+s)(k+r)^2 + \text{nnz}(E) k + r s$      | $k^2(m+n) + n r k$              |
| Alg. 1 (a)                 | -            | -                                       | $(\text{nnz}(E) + n k) k + (k+s) k^2$       | $k^2 m + (\text{nnz}(A) + n) k$ |
| Alg. 1 (b)                 | $\chi$       | -                                       | $(\text{nnz}(E) + (n+r) k) k + (k+r+s) k^2$ | $k^2 m + (\text{nnz}(A) + n) k$ |

The above discussion is summarized in Table 6 where we list the asymptotic complexity of Algorithm 1 and the schemes in (Zha & Simon, 1999) and (Vecharynski & Saad, 2014). The complexities of the latter two schemes were also verified by adjusting the complexity analysis from (Vecharynski & Saad, 2014). To allow for a practical comparison, we replaced all  $\delta$  variables with  $k$  since in practice these variables are equal to at most a small integer multiple of  $k$ .

Consider now a comparison between Algorithm 1 (a) and the method in (Zha & Simon, 1999). For all practical purposes, these two schemes return identical approximations to  $A_k$ . Nonetheless, Algorithm 1 (a) requires no effort to build  $W$ . Moreover, the cost to solve the projected problem is linear with respect to  $s$  and cubic with respect to  $k$ , instead of cubic with respect to the sum  $s + k$  in (Zha & Simon, 1999). The only scenario where Algorithm 1 can be potentially more expensive than (Zha & Simon, 1999) is when matrix  $A$  is exceptionally dense, and both  $k$  and  $s$  are very small. Similar observations can be made for the relation between Algorithm 1 (b) and the methods in (Vecharynski & Saad, 2014), although the comparison is more involved.

## Eigenfaces

A brief description of the eigenfaces technique is as follows.

1. Load the training dataset consisting of  $n$  images, where each image is of size  $\sqrt{m} \times \sqrt{m}$  pixels.
2. Let  $\hat{A} \in \mathbb{R}^{m \times n}$  denote the matrix where each column denotes a vectorized image of size  $\sqrt{m} \times \sqrt{m}$  pixels. Moreover, let  $A = \hat{A} - ze_n^T$ , where  $z \in \mathbb{R}^m$  denotes the column mean, and  $e_n \in \mathbb{R}^n$  denotes the vector of all ones.
3. Form the covariance matrix  $M = A^T A / (n - 1)$ , and compute its  $k$  leading eigenpairs  $(\lambda_i, x^{(i)})$ ,  $i = 1, \dots, k$ . The value of  $k$  is set as the smallest integer such that the explained variance  $\frac{\lambda_1 + \dots + \lambda_k}{\lambda_1 + \dots + \lambda_n}$  is above a chosen threshold  $\epsilon \in \mathbb{R}$ . Let  $X = [x^{(1)}, \dots, x^{(k)}]$ .
4. Compute the projection of the training dataset  $F = \hat{A}X$ .
5. For any new test image  $b \in \mathbb{R}^m$ , compute its projection  $\hat{b} = X^T(b - z)$ .
6. Classify the test image  $b$  by  $\rho$ -Nearest Neighbor classification between  $\hat{b}$  and the rows of matrix  $F$ .

Our implementation of the eigenfaces technique replaces Step 3 as follows. Instead of computing the covariance matrix  $M$ , we set  $k$  a-priori and compute  $X$  by instead computing the  $k$  leading singular triplets of  $A^T$ . Note that the left singular vectors of  $A^T$  and the eigenvectors of  $A^T A$  are the same up to sign. Instead of using a standard SVD solver, we compute the rank- $k$  truncated SVD of  $A^T$  using our updating scheme. This can be especially useful for very large data collections.
